# Supplementary figures and images for: Edible Lepidoptera in Mexico: Geographic distribution, ethnicity, economic and nutritional importance for rural people
Source: Springer Nature journal article supplement (doi:10.1186/1746-4269-7-2), 2011-01-06

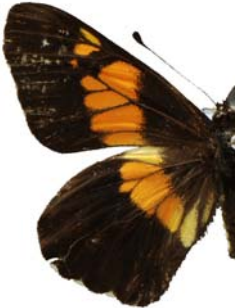

Supplement: 13002_2010_211_MOESM10_ESM.pdf [file 13002_2010_211_MOESM10_ESM.pdf]

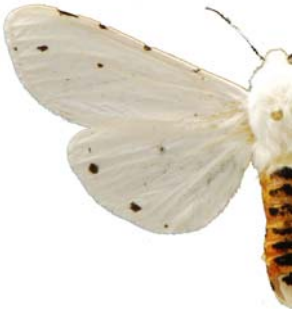

Supplement: 13002_2010_211_MOESM18_ESM.pdf [file 13002_2010_211_MOESM18_ESM.pdf]

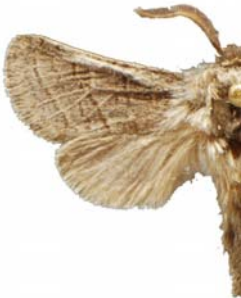

Supplement: 13002_2010_211_MOESM3_ESM.pdf [file 13002_2010_211_MOESM3_ESM.pdf]

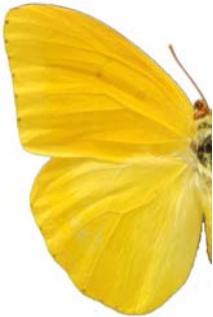

Supplement: 13002_2010_211_MOESM7_ESM.pdf [file 13002_2010_211_MOESM7_ESM.pdf]

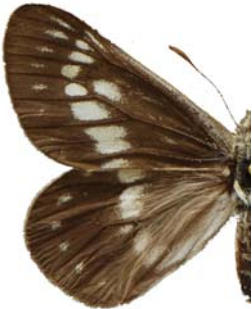

Supplement: 13002_2010_211_MOESM8_ESM.pdf [file 13002_2010_211_MOESM8_ESM.pdf]

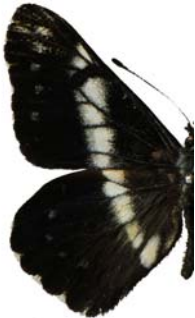

Supplement: 13002_2010_211_MOESM9_ESM.pdf [file 13002_2010_211_MOESM9_ESM.pdf]
